# Supplementary material for: Investigation of the fluorescence quenching behavior of PEI-doped silica nanoparticles and its applications
Source: Royal Society of Chemistry journal article supplement (doi:10.1039/c6ra21543b), 2016-01-01
Supplement: c6ra21543b1.pdf [file c6ra21543b1.pdf]

## Supporting Information

### Investigation of the Fluorescence Quenching Behavior of PEI-Doped Silica Nanoparticles and Its Applications

Yali Qiao and Xingwang Zheng\*

*Key Laboratory of Analytical Chemistry for Life Science of Shaanxi Province, School of Chemistry &  
Chemical Engineering, Shaanxi Normal University, Xi'an 710062, P. R. China*

**\*Corresponding authors:**

Tel.: +86-029-81530791.

E-mail addresses: [zhengxw@snnu.edu.cn](mailto:zhengxw@snnu.edu.cn) or [zhengxwsilica@163.com](mailto:zhengxwsilica@163.com)

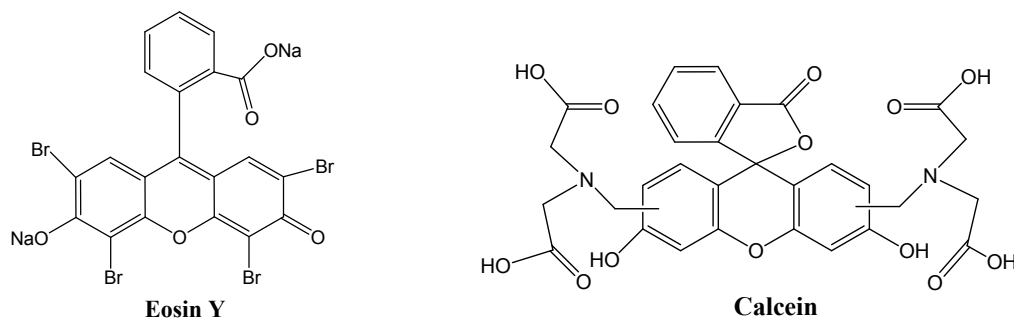

**Fig. S1** Structure of eosin Y (left) and calcein (right)

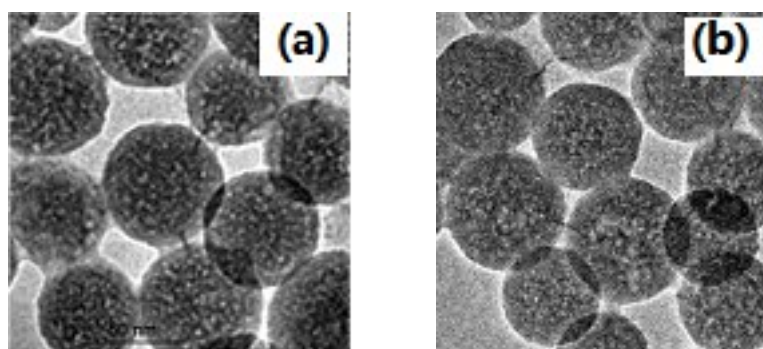

**Fig. S2** TEM Images of (a) PEI/silica nanoparticles and (b) calcein/ PEI/silica nanoparticles.

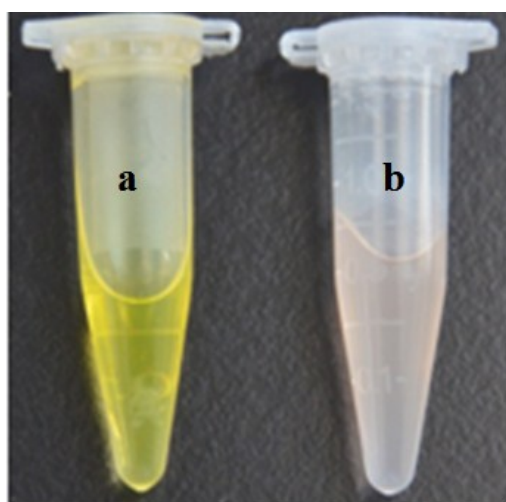

**Fig. S3** Images of free-state calcein (a) and CPSNPs (b) in aqueous solution.

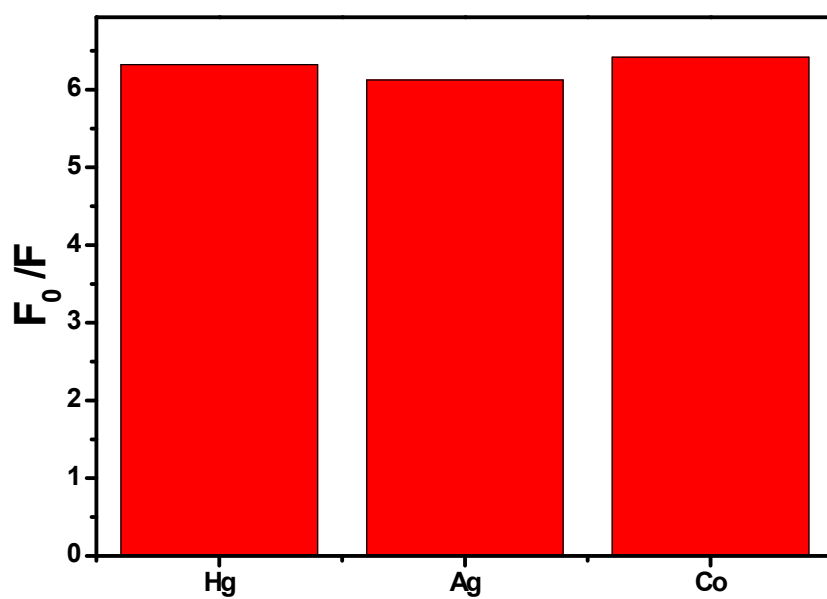

**Fig. S4** Selectivity of the proposed method for  $\text{Co}^{2+}$  to  $\text{Hg}^{2+}$  and  $\text{Ag}^+$  in the solution of 10 mM pH 8.0 PB

with 10 mM NaCl solution ( $5.0 \times 10^{-7}$  M  $\text{Co}^{2+}$  with the coexistence of  $\text{Hg}^{2+}$  and  $\text{Ag}^{+}$  at  $5.0 \times 10^{-6}$  M).

**Table S1** Fluorescence Quantum Yield of CSPNPs, PEI/Calcein Mixture (PEI/Calcein), and Free-State Calcein

| sample | free-state calcein (%) | CPSNPs (%) | PEI/calcein (%) |
|--------|------------------------|------------|-----------------|
| $\Phi$ | 32.4                   | 25.1       | 9.7             |
